# Supplementary material for: Study on the growth of wheat seedlings under acetic acid ionic liquids [Cnmim][OAc] (n = 2, 4, 6)
Source: Royal Society of Chemistry journal article supplement (doi:10.1039/c6ra14311c), 2016-01-01
Supplement: c6ra14311c1.pdf [file c6ra14311c1.pdf]

## Study on the Growth of Wheat Seedlings Under Acetic acid ionic liquids [Cnmim][OAc](n=2,4,6)

Zhonglin Chen, Bing Dai, Weichen Zhang, Wei Guan\*, Neng Liu, Kui Liu,

*School of Environmental Science, Liaoning University, Shenyang 10036, P. R. China*

### Section A $^1\text{H}$ NMR spectra

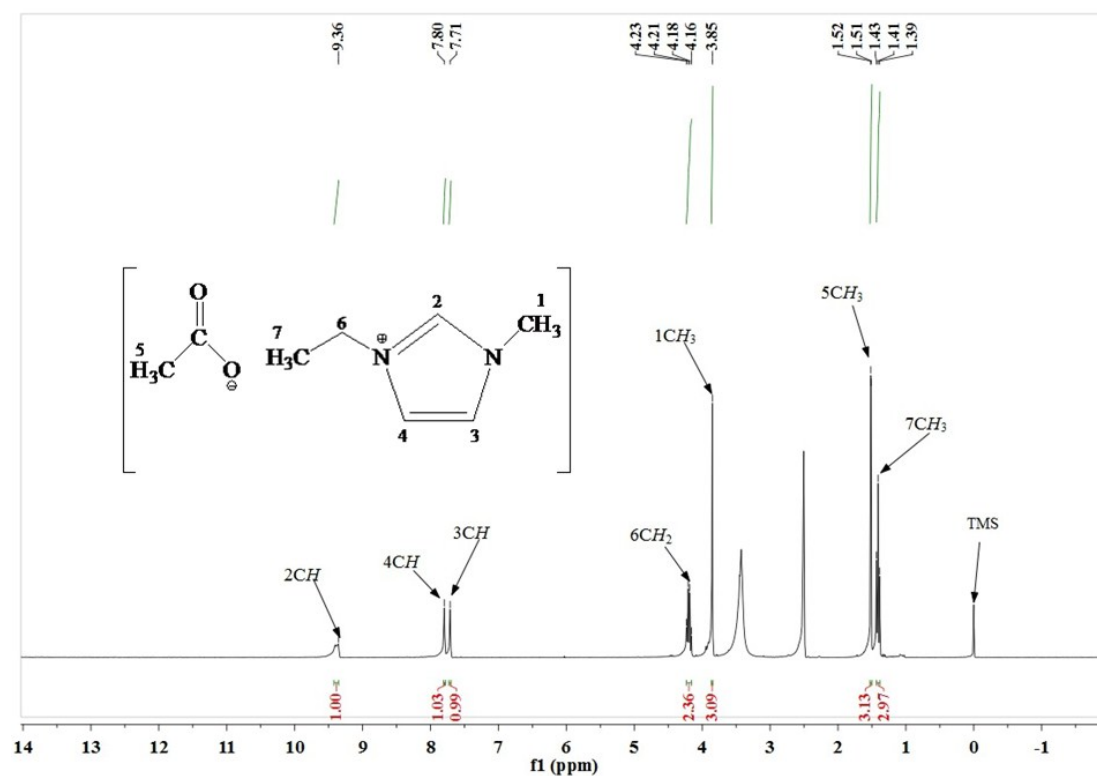

Fig. S1.  $^1\text{H}$  NMR spectrum  $\delta_{\text{H}}$  (300 MHz, DMSO) of [C<sub>2</sub>mim][OAc]

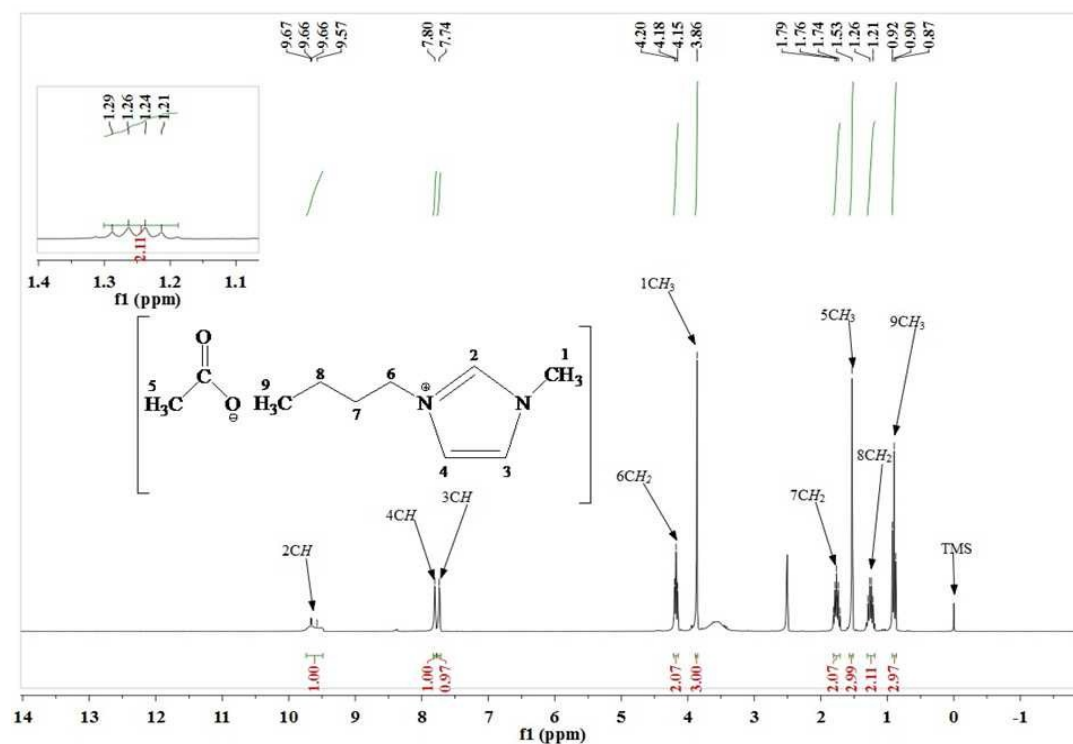

Fig. S2. <sup>1</sup>H NMR spectrum  $\delta_H$  (300 MHz, DMSO) of [C<sub>4</sub>mim][OAc]

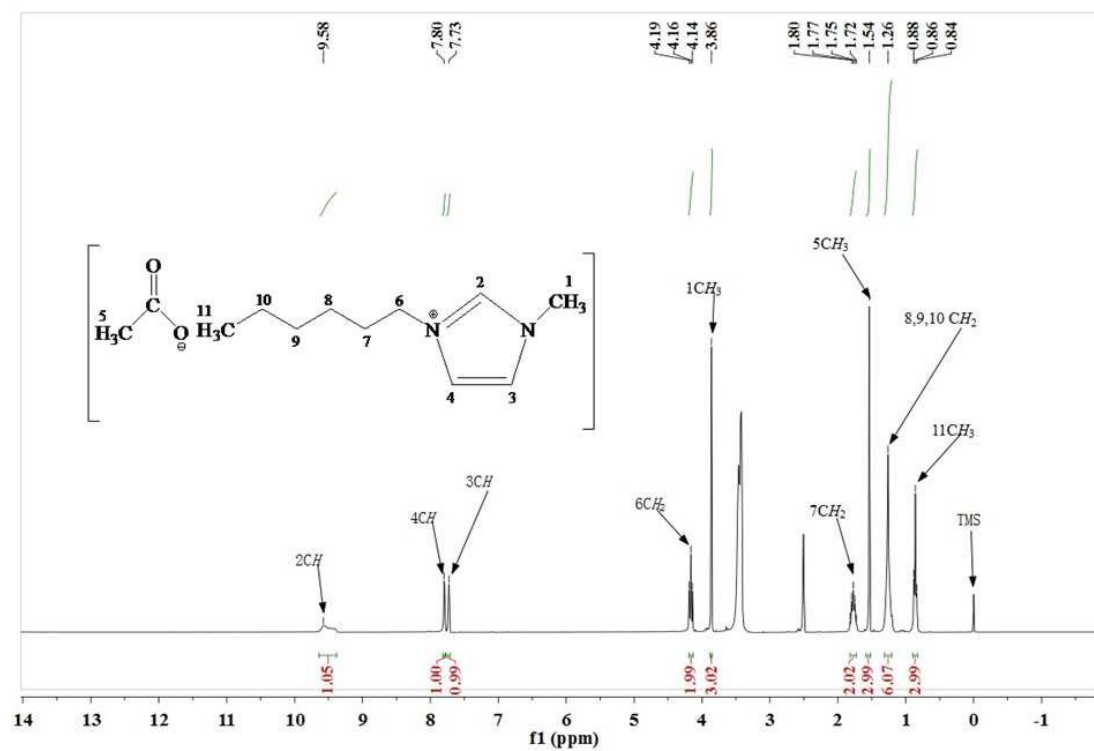

Fig. S3. <sup>1</sup>H NMR spectrum  $\delta_H$  (300 MHz, DMSO) of [C<sub>6</sub>mim][OAc]

## Section B Thermal analysis

Calorimetric data were obtained with a differential scanning calorimeter DSC (Mettler-Toledo Co., Switzerland). The temperature range was  $-100$ - $100$  °C with heating rate of  $10$  °C·min<sup>-1</sup>. Then samples were incubated at  $-100$  °C for 5 min and were then heated to  $100$  °C.

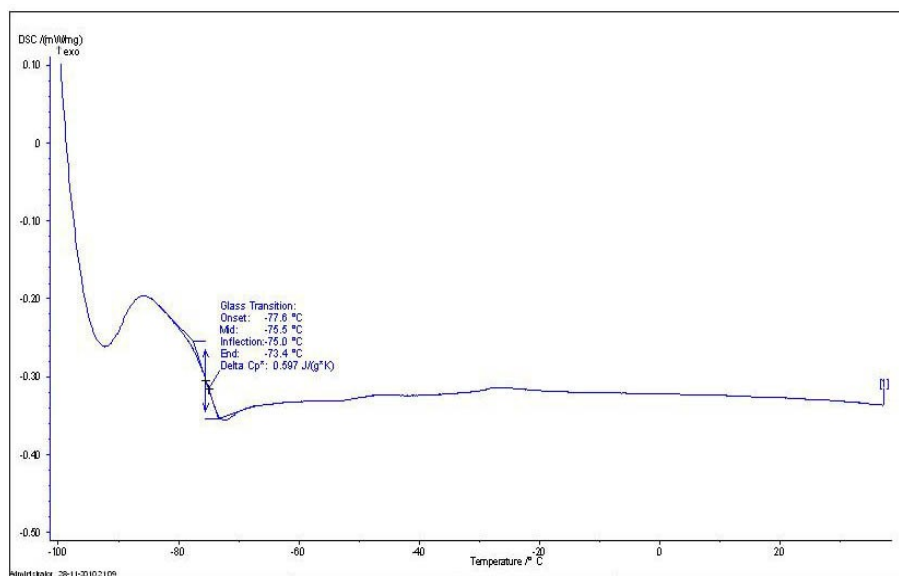

**Fig. S4.** DSC thermogram of [C<sub>2</sub>mim][OAc]

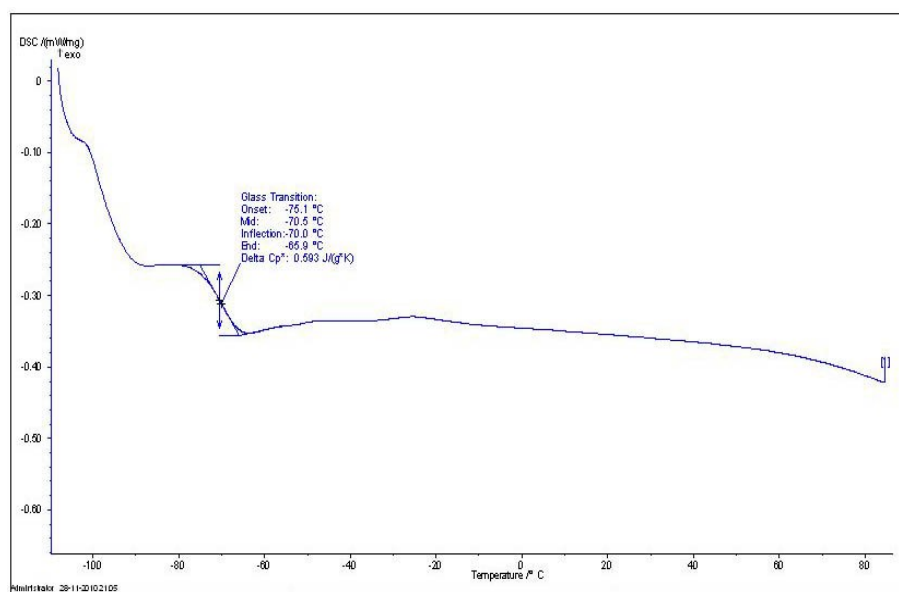

**Fig. S5.** DSC thermogram of [C<sub>4</sub>mim][OAc]

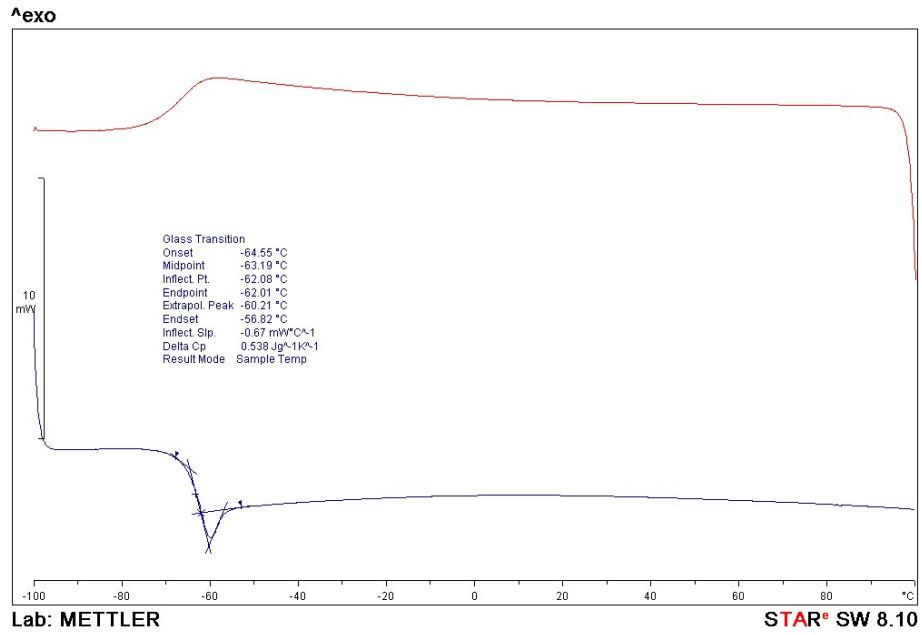

**Fig. S6.** DSC thermogram of [C<sub>6</sub>mim][OAc]
